# Supplementary material
Source: MDPI journal article supplement (https://www.mdpi.com/1424-2818/13/12/670)
Supplement: s1 [file s1]

## Supplementary material

# *Alteriqipengyuania abyssalis* sp. nov., a novel member of the class *Alphaproteobacteria* isolated from sponge, and emended description of the genus *Alteriqipengyuania*

Sanaullah Tareen. Chandra Risdian. Mathias Müsken. Joachim Wink

### Sanaullah Tareen.

Microbial Strain Collection (MISG), Helmholtz Centre for Infection Research (HZI), 38124 Braunschweig, Germany.

Department of Microbiology, Balochistan University of Information Technology Engineering and Management Sciences, 87300 Quetta, Pakistan. Sanaullahtareen734@gmail.com

### Chandra Risdian

Microbial Strain Collection (MISG), Helmholtz Centre for Infection Research (HZI), 38124 Braunschweig, Germany.

Research Unit for Clean Technology, Indonesian Institute of Sciences (LIPI), Bandung 40135, Indonesia

ORCID iD: <https://orcid.org/0000-0001-8997-7851>

### Mathias Müsken

Central Facility for Microscopy, Helmholtz Centre for Infection Research (HZI), 38124 Braunschweig

### Joachim Wink

Microbial Strain Collection (MISG), Helmholtz Centre for Infection Research (HZI), 38124 Braunschweig, Germany. E-mail: [Joachim.Wink@helmholtz-hzi.de](mailto:Joachim.Wink@helmholtz-hzi.de)

**Joachim Wink** is the Corresponding author

Email: [Joachim.Wink@helmholtz-hzi.de](mailto:Joachim.Wink@helmholtz-hzi.de)

ORCID iD: <https://orcid.org/0000-0001-9675-0276>

**Table S1.** Physiological and biochemical characteristics of NZ-12B<sup>T</sup> and reference strains on API ZYM strip system.

| No. | Enzymes                            | NZ-12B <sup>T</sup> | <b>**A. lutimaris</b> strain S-5 <sup>T</sup> | <b>Q. pelagi</b> strain UST081027-248 <sup>T</sup> | <b>Q. citreus</b> strain RE35F/1 <sup>T</sup> | <b>*A. halimionae</b> CPA5 <sup>T</sup> |
|-----|------------------------------------|---------------------|-----------------------------------------------|----------------------------------------------------|-----------------------------------------------|-----------------------------------------|
| 1.  | Alkaline phosphatase               | +                   | ND                                            | +                                                  | +                                             | +                                       |
| 2.  | Esterase (C 4)                     | w+                  | —                                             | w+                                                 | +                                             | +                                       |
| 3.  | Esterase lipase (C 8)              | w+                  | ND                                            | +                                                  | +                                             | +                                       |
| 4.  | Lipase (C 14)                      | w+                  | ND                                            | w+                                                 | w+                                            | +                                       |
| 5.  | Leucine arylamidase                | +                   | ND                                            | +                                                  | +                                             | +                                       |
| 6.  | Valine arylamidase                 | +                   | ND                                            | +                                                  | +                                             | +                                       |
| 7.  | Cystine arylamidase                | +                   | w+                                            | w+                                                 | w+                                            | w+                                      |
| 8.  | Trypsin                            | +                   | ND                                            | w+                                                 | +                                             | w+                                      |
| 9.  | $\alpha$ -chymotrypsin             | +                   | +                                             | +                                                  | -                                             | +                                       |
| 10. | Acid phosphatase                   | +                   | +                                             | +                                                  | +                                             | +                                       |
| 11. | Naphthol-AS-BI-phosphohydrolase    | +                   | +                                             | w+                                                 | +                                             | +                                       |
| 12. | $\alpha$ -galactosidase            | -                   | ND                                            | -                                                  | -                                             | -                                       |
| 13. | $\beta$ -galactosidase             | -                   | -                                             | -                                                  | -                                             | -                                       |
| 14. | $\beta$ -glucuronidase             | -                   | ND                                            | -                                                  | -                                             | -                                       |
| 15. | $\alpha$ -glucosidase              | +                   | -                                             | +                                                  | -                                             | -                                       |
| 16. | $\beta$ -glucosidase               | -                   | ND                                            | -                                                  | -                                             | -                                       |
| 17. | N-acetyl- $\beta$ -glucosaminidase | -                   | +                                             | -                                                  | -                                             | -                                       |
| 18. | $\alpha$ -mannosidase              | -                   | ND                                            | -                                                  | -                                             | -                                       |
| 19. | $\alpha$ -fucosidase               | -                   | ND                                            | -                                                  | -                                             | -                                       |

+ Positive; - Negative; w+ Weakly positive; ND not determined. \* Data from [40]; \*\* Data from [5].

NZ-12B<sup>T</sup> was positive for alkaline phosphatase, leucine arylamidase, valine arylamidase, cystine arylamidase, trypsin,  $\alpha$ -chymotrypsin, acid phosphatase, naphthol-AS-BI-phosphohydrolase and  $\alpha$ -glucosidase whereas negative for  $\beta$ -glucosidase, N-acetyl- $\beta$ -glucosaminidase,  $\alpha$ -mannosidase,  $\alpha$ -fucosidase,  $\alpha$ -galactosidase,  $\beta$ -galactosidase and  $\beta$ -glucuronidase and displayed weak growth for Esterase (C 4), Esterase lipase (C 8) and Lipase (C 14).

**Table S2.** Physiological and biochemical characteristics of NZ-12B<sup>T</sup> and reference strains on API 20E strip system.

| No. | Enzymes                              | NZ-12B <sup>T</sup> | <b>**A. lutimaris</b> strain S-5 <sup>T</sup> | <b>Q. pelagi</b> strain UST081027-248 <sup>T</sup> | <b>Q. citreus</b> strain RE35F/1 <sup>T</sup> | <b>*A. halimionae</b> CPA5 <sup>T</sup> |
|-----|--------------------------------------|---------------------|-----------------------------------------------|----------------------------------------------------|-----------------------------------------------|-----------------------------------------|
| 1.  | $\beta$ -galactosidase (ONPG)        | —                   | ND                                            | —                                                  | —                                             | ND                                      |
| 2.  | Arginine dihydrolase                 | +                   | ND                                            | —                                                  | —                                             | ND                                      |
| 3.  | lysine decarboxylase                 | w+                  | ND                                            | —                                                  | —                                             | ND                                      |
| 4.  | Ornithine decarboxylase              | —                   | ND                                            | —                                                  | —                                             | ND                                      |
| 5.  | Citrate utilization                  | w+                  | ND                                            | —                                                  | —                                             | ND                                      |
| 6.  | Hydrogen sulfide production          | —                   | ND                                            | W+                                                 | +                                             | ND                                      |
| 7.  | Urease                               | —                   | ND                                            | —                                                  | —                                             | ND                                      |
| 8.  | Tryptophan deaminase                 | w+                  | ND                                            | +                                                  | +                                             | ND                                      |
| 9.  | Indole production                    | -                   | ND                                            | —                                                  | —                                             | ND                                      |
| 10. | Voges proskauer (acetoin production) | -                   | ND                                            | —                                                  | —                                             | ND                                      |
| 11. | Gelatinase                           | +                   | ND                                            | W+                                                 | —                                             | ND                                      |
| 12. | Glucose fermentation                 | —                   | ND                                            | —                                                  | —                                             | ND                                      |
| 13. | Mannitol fermentation                | —                   | ND                                            | —                                                  | —                                             | ND                                      |
| 14. | Inositol fermentation                | —                   | ND                                            | —                                                  | —                                             | ND                                      |
| 15. | Sorbitol fermentation                | —                   | ND                                            | —                                                  | —                                             | ND                                      |
| 16. | Rhamnose fermentation                | —                   | ND                                            | —                                                  | —                                             | ND                                      |
| 17. | Saccharose fermentation              | —                   | ND                                            | —                                                  | +                                             | ND                                      |
| 18. | Melibiose fermentation               | —                   | ND                                            | —                                                  | —                                             | ND                                      |
| 19. | Amygdalin fermentation               | —                   | ND                                            | +                                                  | —                                             | ND                                      |
| 20. | Arabinose fermentation               | —                   | ND                                            | —                                                  | —                                             | ND                                      |

+ Positive; - Negative; w+ weakly positive; ND not determined. \* Data from [40]; \*\* Data from [5].

NZ-12B<sup>T</sup> was positive for arginine dihydrolase and gelatinase whereas negative for Glucose fermentation, mannitol fermentation, Inositol fermentation, sorbitol fermentation, rhamnose fermentation, saccharose fermentation, melibiose fermentation, amygdalin fermentation, arabinose fermentation and displayed weak growth for tryptophan deaminase, citrate utilization and lysine decarboxylase.

**Table S3.** Physiological and biochemical characteristics of NZ-12B<sup>T</sup> and reference strains on API 20NE strip system.

| No. | Enzymes                                 | NZ-12B <sup>T</sup> | <i>**A. lutimaris strain S-5<sup>T</sup></i> | <i>Q. pelagi strain UST081027-248<sup>T</sup></i> | <i>Q. citreus strain RE35F/1<sup>T</sup></i> | <i>*A. halimionae CPA5<sup>T</sup></i> |
|-----|-----------------------------------------|---------------------|----------------------------------------------|---------------------------------------------------|----------------------------------------------|----------------------------------------|
| 1.  | Nitrate reduction                       | —                   | ND                                           | —                                                 | —                                            | —                                      |
| 2.  | Indole production                       | —                   | ND                                           | —                                                 | —                                            | —                                      |
| 3.  | Arginine Dihydrolase                    | +                   | ND                                           | —                                                 | —                                            | —                                      |
| 4.  | Urease                                  | —                   | ND                                           | —                                                 | —                                            | —                                      |
| 5.  | Esculin hydrolysis                      | +                   | ND                                           | +                                                 | +                                            | +                                      |
| 6.  | Gelatin hydrolysis                      | —                   | ND                                           | —                                                 | —                                            | —                                      |
| 7.  | β-galactosidase (PNPG)                  | —                   | ND                                           | —                                                 | W+                                           | —                                      |
| 8.  | Glucose assimilation                    | —                   | ND                                           | —                                                 | —                                            | —                                      |
| 9.  | Arabinose assimilation                  | —                   | ND                                           | —                                                 | —                                            | —                                      |
| 10. | Mannose assimilation                    | —                   | ND                                           | +                                                 | —                                            | —                                      |
| 11. | Mannitol assimilation                   | —                   | ND                                           | —                                                 | —                                            | —                                      |
| 12. | N-acetyl- Glucosamine as-<br>similation | —                   | ND                                           | —                                                 | —                                            | —                                      |
| 13. | Maltose assimilation                    | —                   | ND                                           | —                                                 | +                                            | —                                      |
| 14. | Potassium gluconate assimi-<br>lation   | —                   | ND                                           | —                                                 | —                                            | —                                      |
| 15. | Capric acid assimilation                | —                   | ND                                           | —                                                 | —                                            | —                                      |
| 16. | Adipic acid assimilation                | —                   | ND                                           | —                                                 | —                                            | —                                      |
| 17. | Malate assimilation                     | —                   | ND                                           | —                                                 | —                                            | —                                      |
| 18. | Trisodium citrate assimi-<br>lation     | —                   | ND                                           | —                                                 | —                                            | —                                      |
| 19. | Phenylacetic acid assimi-<br>lation     | —                   | ND                                           | —                                                 | —                                            | —                                      |

+ Positive; - Negative; w+ weakly positive; ND not determined.\* Data from [40]; \*\* Data from [5].

NZ-12B<sup>T</sup> was positive for esculin hydrolysis and arginine dihydrolase whereas negative for mannose assimilation, mannitol assimilation, N-acetyl-Glucosamine assimilation, maltose assimilation and potassium gluconate assimilation and remaining substrates in the API 20NE strip system.

**Table S4.** Physiological and biochemical characteristics of NZ-12B<sup>T</sup> on Biolog Gen III Microplate.

| A1                          | Dextrin              | D-Maltose                  | D-Trehalose             | D-cellobiose        | Gentiobiose             | Sucrose                      | D-Turanose               | stachyose                |
|-----------------------------|----------------------|----------------------------|-------------------------|---------------------|-------------------------|------------------------------|--------------------------|--------------------------|
|                             | +                    | +                          | -                       | -                   | -                       | -                            | +                        | -                        |
| D-Raffinose                 | α-D-lactose          | D-Melibiose                | β-Methyl-D-Glucoside    | D-Salicin           | N-Acetyl-D-Glucoasamine | N-Acetyl-βD-Mannosa-<br>mine | N-Acetyl-D-Galactosamine | N-Acetyl Neuraminic acid |
| -                           | +                    | -                          | +                       | +                   | +                       | +                            | +                        | +                        |
| α-D-Glucose                 | D-Mannose            | D-Fructose                 | D-Galactose             | 3-Methyl Glucose    | D-Fucose                | L-Fucose                     | L-Rhamnose               | Inosine                  |
| -                           | -                    | +                          | +                       | -                   | +                       | +                            | -                        | -                        |
| D-Sorbitol                  | D-Mannitol           | D-Arabitol                 | myo-Inositol            | Glycerol            | D-Glucose-6-PO4         | D-Fructose-6-PO4             | D-Aspartic acid          | D-Serine                 |
| -                           | -                    | +                          | -                       | +                   | -                       | +                            | -                        | +                        |
| Gelatin                     | Glycyl-L-Proline     | L-Alanine                  | L-Arginine              | L-Aspartic acid     | L-Glutamic acid         | L-Histidine                  | L-Pyrogutamic acid       | L-Serine                 |
| -                           | +                    | -                          | +                       | +                   | +                       | -                            | +                        | +                        |
| Pectin                      | D-Galacturonic acid  | L-Galactonic Acid lactone  | D-Gluconic acid         | D-Glucuronic acid   | Glucuronamide           | Mucic acid                   | Quinic acid              | D-Saccharic acid         |
| +                           | +                    | +                          | +                       | +                   | +                       | +                            | +                        | +                        |
| p-Hydroxy-phenylacetic acid | Methyl Pyruvate      | D-Lactic acid Methyl ester | L-Lactic acid           | Citric acid         | α-keto-Glutaric acid    | D-Malic acid                 | L-Malic acid             | Bromo-succinic acid      |
| -                           | -                    | +                          | +                       | +                   | +                       | +                            | +                        | -                        |
| Tween 40                    | γ-Amino-Butyric Acid | α-hydroxy-Butyric acid     | β-hydroxy-D,LButyriacid | α-keto-Butyric acid | Acetoacetic acid        | Propionic acid               | Acetic acid              | Formic acid              |
| +                           | -                    | -                          | +                       | -                   | +                       | -                            | +                        | -                        |

+ Positive; - Negative

NZ-12B<sup>T</sup> was positive for acetoacetic acid, L-Galactonic Acid lactone, glycyl-L-proline, L-Glutamic acid, α-D-lactose, L-Fucose and negative for L-Histidine, myo-Inositol, L-Rhamnose and Sucrose, β-Methyl-D-Glucoside, D-Salicin, N-Acetyl-D-Glucoasamine, N-Acetyl-βD-Mannosamine, N-Acetyl Neuraminic acid, D-Fructose, L-Aspartic acid, α-keto-Glutaric acid, L-Malic acid, Citric acid, D-Malic acid.

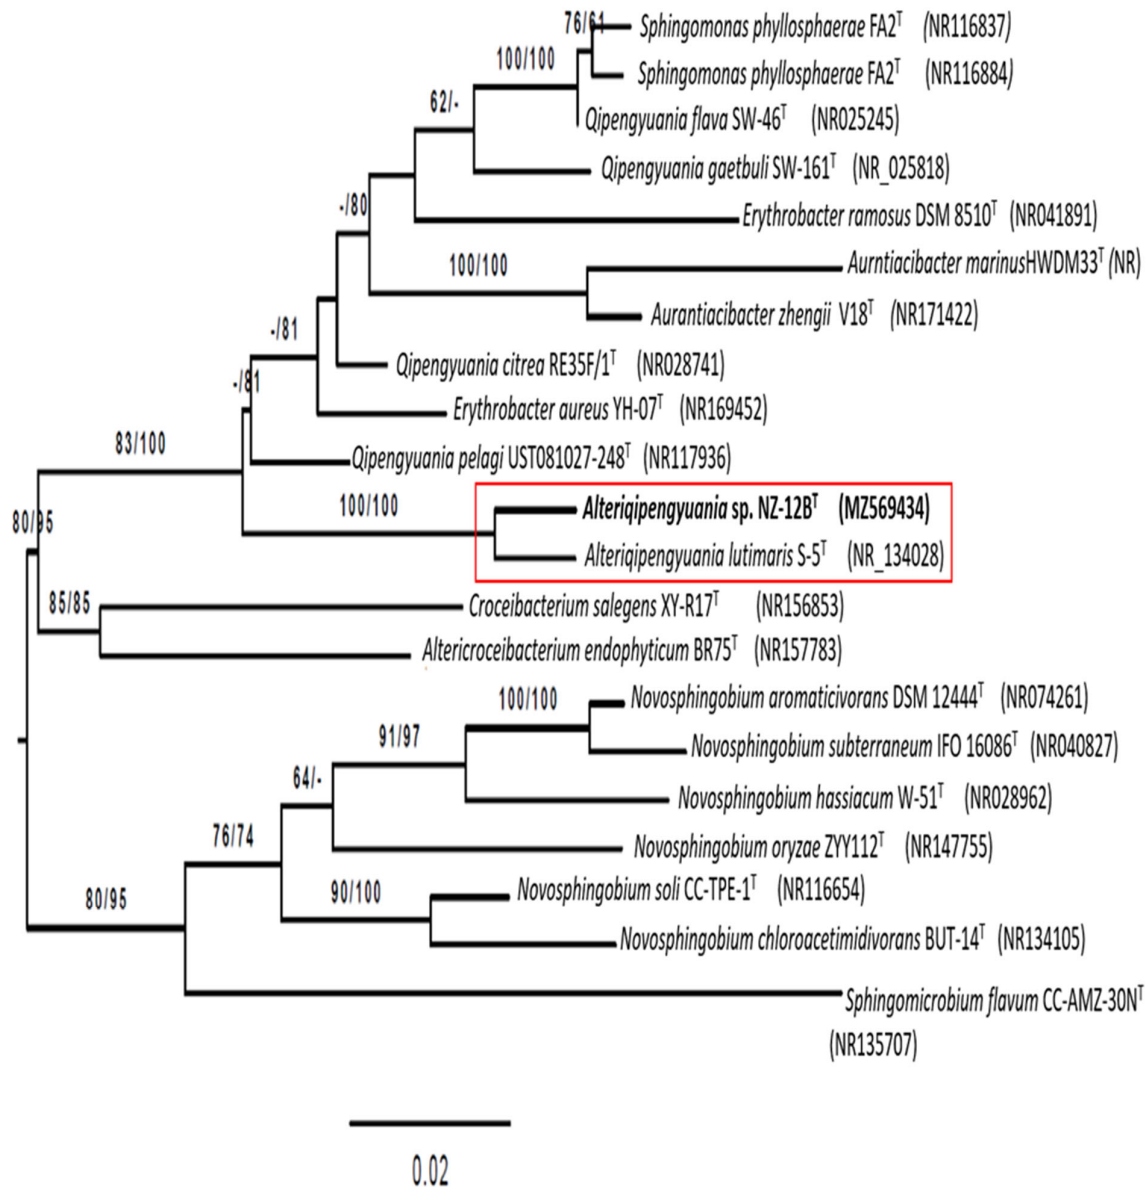

**Figure S1.** Maximum-likelihood phylogenetic tree based on almost complete 16S rRNA gene sequence of strain NZ-12B<sup>T</sup> and its most closely related species using the GTR+GAMMA model of GGDC. The numbers above the branches are bootstrap support values greater than 60% for maximum likelihood (left) and maximum-parsimony (right). Bar, 0.02 substitution per nucleotide position.

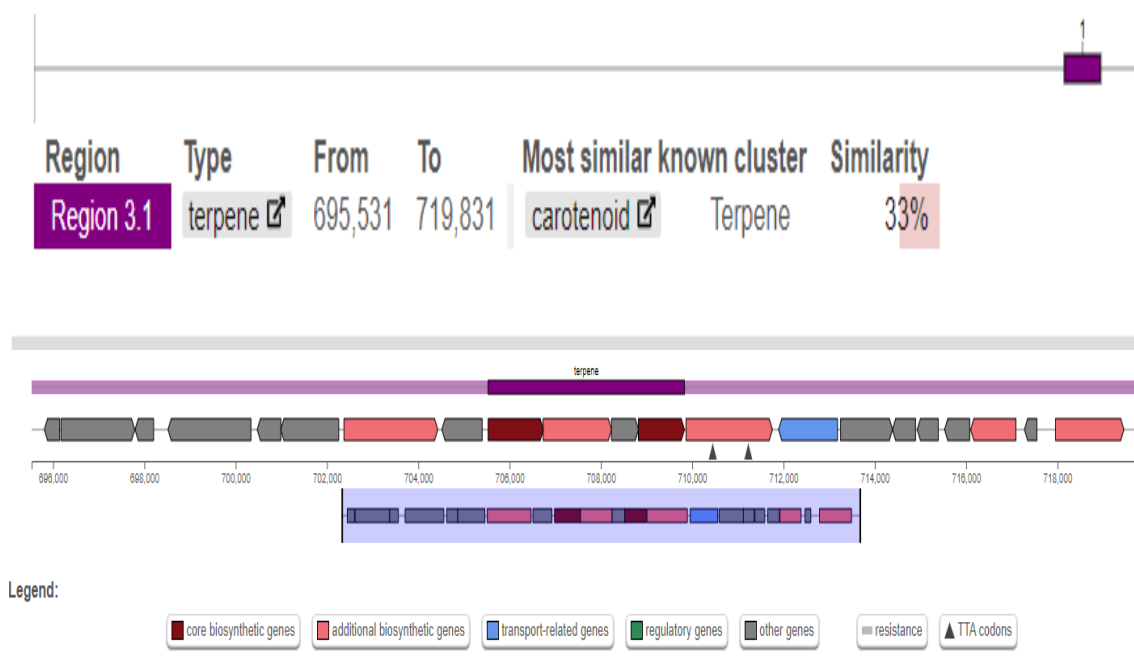

**Figure S2.** Predicted secondary metabolite gene cluster for strain NZ-12B<sup>T</sup> identified by analysis of the NZ-12B<sup>T</sup> genome sequence with the bioinformatic tool antiSMASH 5.0.
